# Supplementary material for: Anti-ambipolar behavior and photovoltaic effect in p-MoTe2/n-InSe heterojunctions
Source: Royal Society of Chemistry journal article supplement (doi:10.1039/d1tc02497c), 2021-01-01
Supplement: d1tc02497c1.pdf [file d1tc02497c1.pdf]

**Supplementary Information**

**for**

**Anti-ambipolar and Photovoltaic effect in**

**p-MoTe<sub>2</sub>/n-InSe Heterojunctions**

*Yiming Sun,<sup>†‡</sup> Wei Gao,<sup>†‡</sup> Xueping Li,<sup>§</sup> Congxin Xia,<sup>§</sup> Hongyu Chen,<sup>†‡</sup> Li Zhang,<sup>†‡</sup> Dongxiang Luo,<sup>†‡</sup>  
Weijun Fan,<sup>||</sup> Nengjie Huo<sup>†‡\*</sup> and Jingbo Li<sup>†‡\*</sup>*

<sup>†</sup> Guangdong Engineering Research Center of Optoelectronic Functional Materials and Devices, South China Normal University, Guangzhou 510631, People's Republic of China.

<sup>‡</sup> Guangdong Key Lab of Chip and Integration Technology, Guangzhou 510631, P.R. China

<sup>§</sup> College of Physics and Materials Science, Henan Normal University, Xinxiang, 453600, Henan, China.

<sup>||</sup> School of Electrical and Electronic Engineering, Nanyang Technological University, Singapore.

<sup>‡</sup> These authors contributed equally to this work.

## Figure Caption

**Figure S1.** XRD pattern of  $\beta$ -InSe.

**Figure S2.** PL spectra of the InSe/MoTe<sub>2</sub> heterostructure.

**Figure S3.** Calculated band edges of single-layer and InSe and MoTe<sub>2</sub> with respect to the vacuum level.

**Figure S4.** Schematic illustration of PVA transfer methods.

**Figure S5.** (a-b) Transfer characteristic of InSe and MoTe<sub>2</sub> with different thickness.

**Figure S6.**  $I_{ds}-V_{ds}$  curves of the MoTe<sub>2</sub>/InSe anti-ambipolar transistors with different  $V_{ds}$ .

**Figure S7.**  $I_{ds}-V_{ds}$  characteristics of the detector in different light intensities at 635 nm.

**Figure S8.** (a)  $I-t$  curves of the device under light intensities 405 and 635 nm without biase for longtime.

**Figure S9.**  $I-t$  curves of the device under various biases with light wavelength at 635 nm.

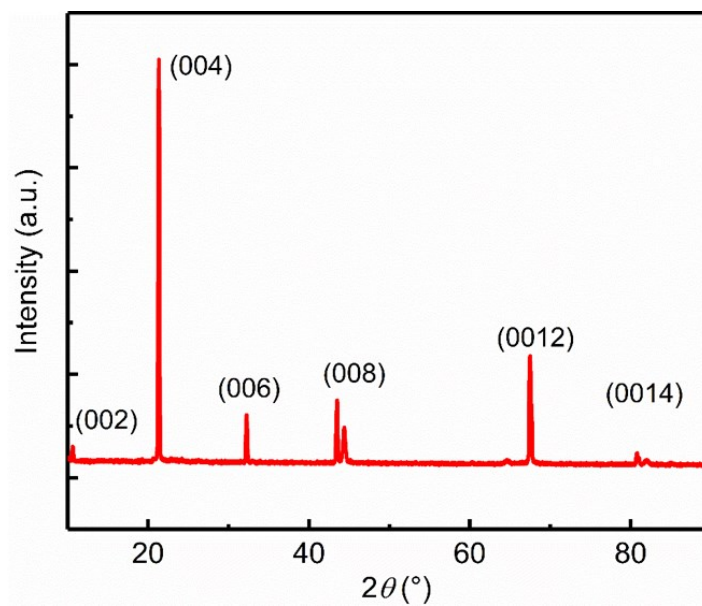

**Figure S1.** XRD pattern of  $\beta$ -InSe.

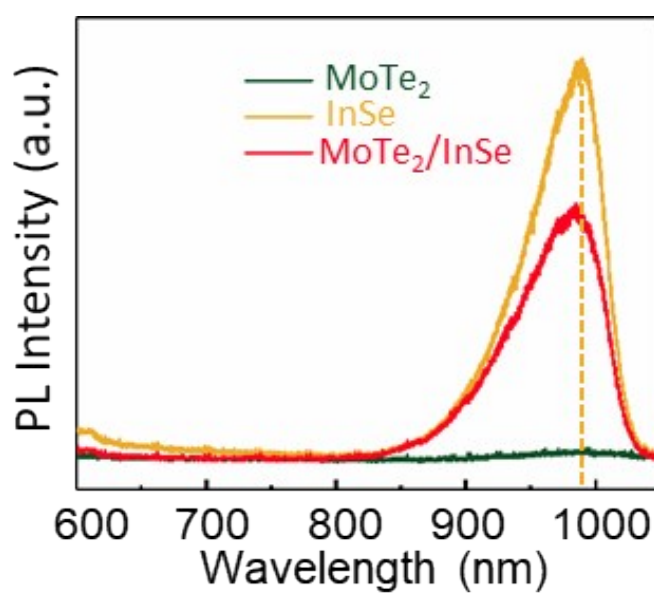

**Figure S2.** PL spectra of the InSe/MoTe<sub>2</sub> heterostructure.

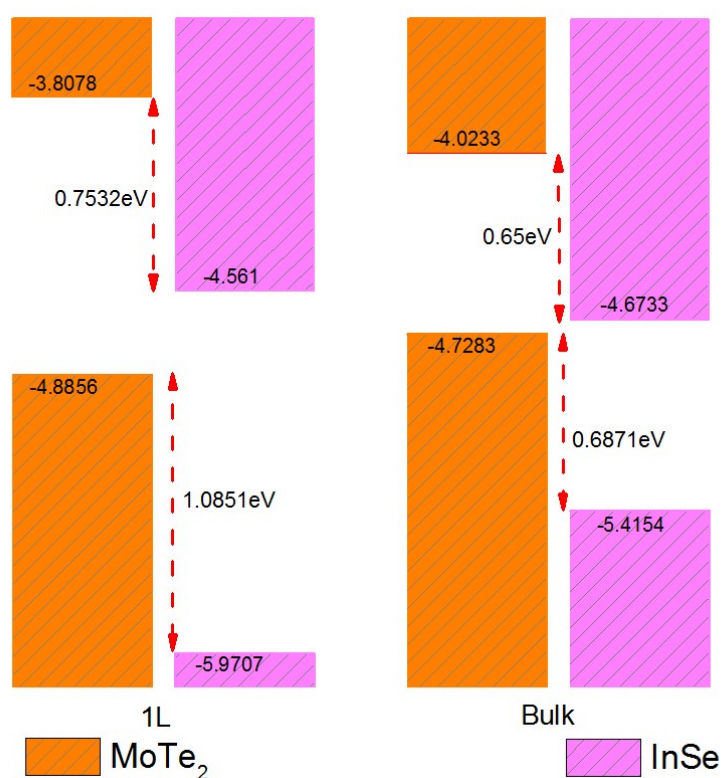

**Figure S3.** Calculated band edges of single-layer and InSe and MoTe<sub>2</sub> with respect to the vacuum level.

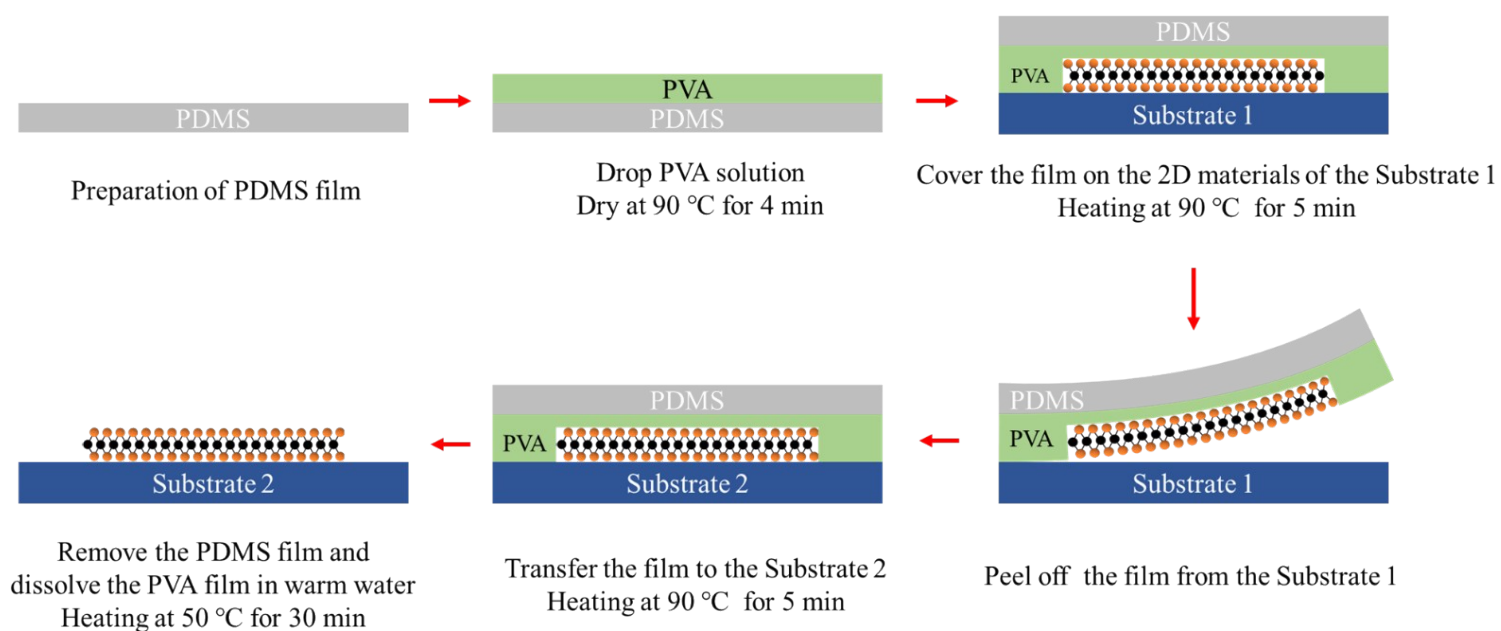

**Figure S4.** Schematic illustration of PVA transfer methods.

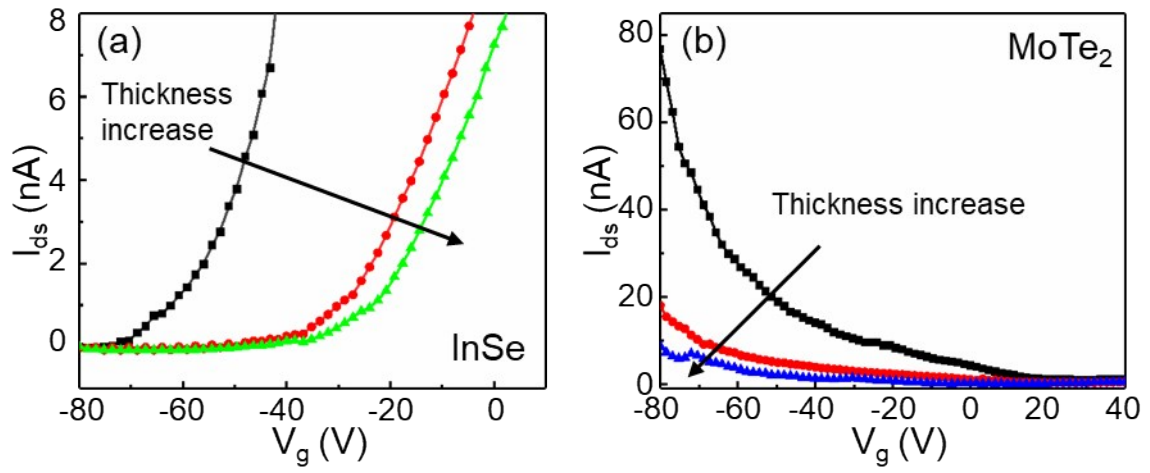

**Figure S5.** (a-b) Transfer characteristic of InSe and MoTe<sub>2</sub> with different thickness.

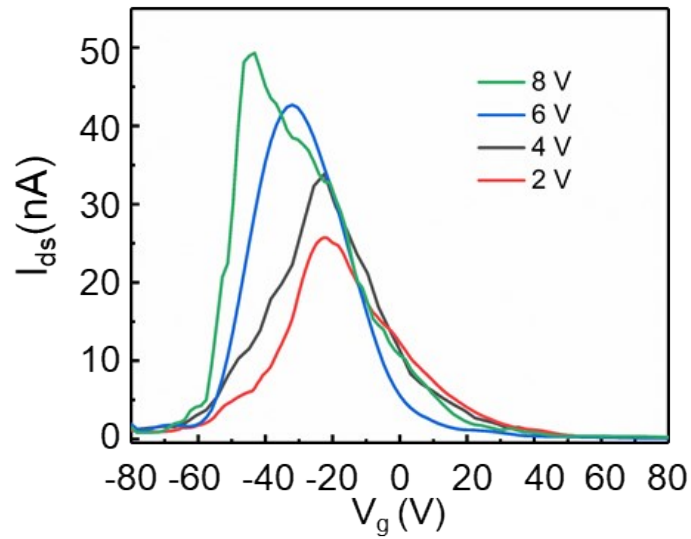

**Figure S6.**  $I_{ds}$ – $V_{ds}$  curves of the MoTe<sub>2</sub>/InSe anti-bipolar transistors with different  $V_{ds}$ .

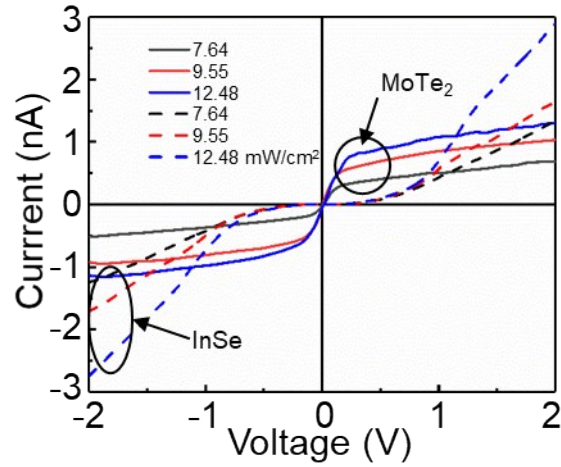

**Figure S7.**  $I_{ds}$ - $V_{ds}$  characteristics of the detector in different light intensities at 635 nm.

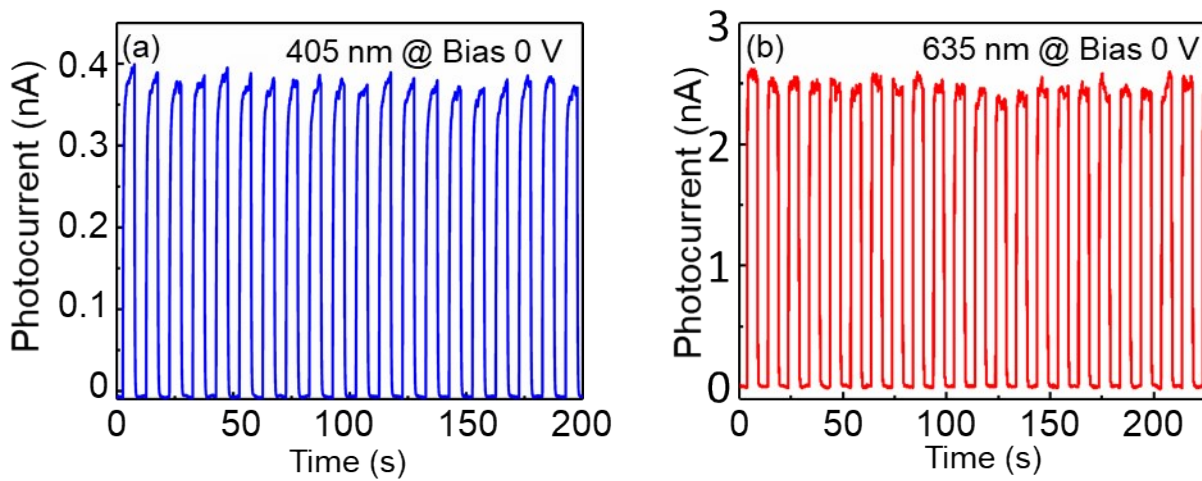

**Figure S8.** (a) I-t curves of the device under light intensities 405 and 635 nm without bias for longtime.

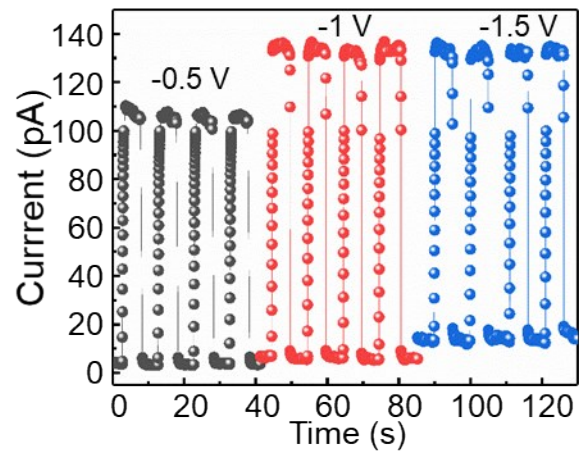

**Figure S9.** I-t curves of the device under various biases with light wavelength at 635 nm.
